# Supplementary material for: The Circadian Clock Coordinates Ribosome Biogenesis
Source: PLoS Biol. 2013 Jan 3;11(1):e1001455. doi: 10.1371/journal.pbio.1001455 (PMC3536797; doi:10.1371/journal.pbio.1001455)
Supplement: Table S3 — Affymetrix microarray probes presenting a rhythmic polysomal/total RNA ratio and in phase with TORC1 activation (complement to Figure 3A ). Affymetrix microarray probes presenting a rhythmic polysomal/total RNA ratio and in phase with TORC1 activation were classified according to the phase of the maximum value (all include between ZT14 and ZT18). (XLS) [file pbio.1001455.s021.xls]

## Sheet: Liste finale
	Affy probes	Genes	Phase	Amplitude	p_value
	1434523_x_at	Eif3e	14.1763	2.14496	0.000330826
	1415716_a_at	Rps27	15.0865	3.49347	0.000107805
	1450840_a_at	Rpl39	15.1796	4.3465	0.000302174
	1454778_x_at	Rps28	15.4345	2.43211	0.00046125
	1423763_x_at	Rps28	15.436	2.4676	0.000223842
	1426162_a_at	Rpl7	15.4517	2.67275	0.000867835
	1415979_x_at	Rpl7	15.5613	2.04503	0.000380954
	1416603_at	Rpl22	15.6026	3.7758	1.25983e-05
	1453118_s_at	Rpl22	15.6215	3.53848	8.58135e-06
	1416807_at	Rpl36a	15.6447	2.55847	4.20374e-05
	1438655_a_at	Rpl34	15.6514	3.66179	5.82131e-05
	1460543_x_at	Rpl37a	15.6565	2.86832	2.94522e-05
	1415701_x_at	Rpl23	15.7093	2.02844	1.66746e-05
	1435593_x_at	Rps7	15.7984	4.03869	3.0809e-05
	1456628_x_at	Rps24	15.8237	4.38428	3.42312e-05
	1422475_a_at	Rps3a	15.8262	2.92659	6.32065e-05
	1460201_a_at	Rpl24	15.8299	1.67609	6.73613e-05
	1433549_x_at	Rps21	15.8353	4.75808	0.000650241
	1454859_a_at	Rpl23	15.8533	2.10543	4.32522e-05
	1437975_a_at	Rpl23a	15.8567	2.93852	8.82652e-06
	1451101_a_at	Rps28	15.8707	2.10207	3.0428e-05
	1460680_a_at	Rpl23	15.875	2.34692	0.000186107
	1428530_x_at	Rps24	15.879	3.93743	5.47455e-05
	1455767_x_at	Rpl21	15.8988	2.7684	0.000511053
	1455662_x_at	Rps17	15.9029	2.63595	2.23541e-05
	1416277_a_at	Rplp1	15.9166	2.20169	0.000558026
	1434872_x_at	Rpl37	15.9281	2.78574	1.8283e-05
	1438986_x_at	Rps17	15.9467	2.72407	2.60618e-05
	1429077_x_at	Rpl21	15.9482	2.11646	0.000141573
	1453362_x_at	Rps24	15.9543	3.63294	2.38504e-05
	1419364_a_at	Rps7	15.9632	3.26071	3.62476e-05
	1434358_x_at	Rps21	15.9832	3.56093	0.000182413
	1455364_a_at	Rps7	15.9879	4.11371	5.76939e-05
	1416217_a_at	Rpl37a	16.0098	2.79118	1.19984e-05
	1423665_a_at	Rpl5	16.0369	1.80811	0.000525139
	1449255_a_at	Rpl15	16.0738	2.16824	0.000925559
	1435712_a_at	Rps18	16.105	4.20634	9.52304e-06
	1437510_x_at	Rps17	16.1154	2.97367	1.38124e-05
	1425183_a_at	Rpl4	16.1217	2.16722	0.000626855
	1437976_x_at	Rpl23a	16.1234	2.12179	2.44224e-05
	1416026_a_at	Rpl12	16.1431	4.10225	2.49071e-05
	1415867_at	Cct4	16.1838	1.65304	0.000103275
	1416453_x_at	Rps12	16.1881	4.43623	3.60475e-05
	1448344_at	Rps12	16.1907	4.91459	1.67345e-05
	1435725_x_at	Rpl12	16.1949	3.10053	2.05178e-05
	1436064_x_at	Rps24	16.1983	2.93888	3.77225e-06
	1428152_a_at	Rpl18a	16.2018	2.43434	5.25376e-06
	1436586_x_at	Rps14	16.2059	2.52617	4.8942e-06
	1435151_a_at	Rps3	16.2109	2.47694	0.000111128
	1449196_a_at	Rps27a	16.2124	2.6313	2.66579e-05
	1426659_a_at	Rpl23a	16.2133	2.75729	1.33269e-05
	1433432_x_at	Rps12	16.2188	4.20793	1.46152e-05
	1436995_a_at	Rpl26	16.2286	2.96671	1.01379e-05
	1424766_at	Ercc6l	16.2371	1.91365	0.000407376
	1453729_a_at	Rpl37	16.2426	2.40744	5.41223e-06
	1459986_a_at	Rps17	16.2827	2.63127	7.19084e-06
	1433721_x_at	Rps21	16.2966	3.09872	1.66801e-05
	1417317_s_at	Rpl35a	16.2968	2.13048	1.06349e-05
	1454856_x_at	Rpl35	16.2993	2.88229	1.34216e-05
	1426660_x_at	Rpl23a	16.3028	2.40386	1.86428e-05
	1434624_x_at	Rps9	16.3119	2.52106	0.000812567
	1451068_s_at	Rps25	16.3166	2.70003	1.67925e-05
	1416243_a_at	Rpl35	16.3297	2.79138	2.23479e-05
	1460175_at	Rps23	16.3605	3.01692	6.17797e-06
	1436822_x_at	Rpl17	16.3744	3.32859	9.70409e-05
	1417615_a_at	Rpl11	16.3819	2.50176	5.95672e-06
	1415736_at	Pfdn5	16.3829	2.23687	1.00476e-05
	1420000_s_at	Igbp1	16.3897	2.28297	0.000151376
	1418273_a_at	Rpl30	16.3944	3.84365	6.20516e-06
	1434231_x_at	Rpl35	16.3965	2.90651	8.00246e-06
	1416276_a_at	Rps4x	16.4065	2.97742	9.17203e-06
	1433510_x_at	Rpl36	16.4109	3.17794	5.50786e-05
	1416088_a_at	Rps15	16.4139	2.80342	0.000680309
	1456373_x_at	Rps20	16.4179	3.43755	1.68615e-05
	1448739_x_at	Rps18	16.4199	4.45369	8.20365e-06
	1416099_at	Rpl27	16.4261	1.53141	0.000884571
	1456436_x_at	Rps20	16.4554	3.43049	1.21839e-05
	1454620_x_at	Rps6	16.4602	2.03032	0.000258744
	1460637_s_at	Pfdn5	16.4693	2.55006	0.000105287
	1428212_x_at	Rpl31	16.4842	2.81162	1.14148e-05
	1453467_s_at	Rps15a	16.4972	2.92137	1.96006e-05
	1416519_at	Rpl36	16.4978	2.60144	3.27666e-05
	1430288_x_at	Rps21	16.4996	3.18091	9.14767e-06
	1416420_a_at	Rpl9	16.5299	2.7931	9.47923e-05
	1449243_a_at	Rps19	16.5314	5.79247	3.12167e-06
	1455485_x_at	Rpl13a	16.5892	2.21283	6.34591e-06
	1448109_a_at	Rpl26	16.5903	3.6965	9.12574e-06
	1448157_s_at	Rpl10	16.5934	2.0452	4.79458e-05
	1460008_x_at	Rpl31	16.5957	2.50944	1.84605e-05
	1416642_a_at	Tpt1	16.5971	2.09306	8.82731e-05
	1448245_at	Rpsa	16.6077	2.70935	2.39985e-05
	1416054_at	Rps5	16.6189	4.25915	3.92239e-06
	1455950_x_at	Rpl35	16.6209	2.84596	6.59809e-06
	1416520_x_at	Rpl36	16.6224	2.79698	1.71647e-05
	1426661_at	Rpl27a	16.6245	2.50526	7.04001e-06
	1435897_at	Rpl32	16.6279	5.73481	5.96664e-06
	1434377_x_at	Rps6	16.6314	1.74985	0.000201794
	1455572_x_at	Rps18	16.634	4.79803	2.70361e-06
	1436840_x_at	Rpl35	16.6411	2.78554	3.6601e-05
	1435791_x_at	Rpl17	16.6453	3.01066	0.000157511
	1423666_s_at	Rpl5	16.6683	3.21583	8.23307e-05
	1436924_x_at	Rpl31	16.6684	2.71297	3.60229e-05
	1438626_x_at	Rpl14	16.6739	3.33542	0.000110737
	1436760_a_at	Rps8	16.6751	2.51901	0.00010058
	1443843_x_at	Rpl9	16.6826	2.11686	5.6986e-05
	1427875_a_at	Rpl34	16.6933	2.71478	4.79918e-06
	1416089_at	Rps15	16.7158	2.81209	0.0002963
	1432264_x_at	Cox7a2l	16.7433	2.1726	0.000804352
	1423855_x_at	Rpl17	16.7665	3.43902	5.10743e-05
	1421772_a_at	Cox7a2l	16.7804	1.93279	0.000931765
	1437196_x_at	Rps16	16.7846	2.239	8.63414e-06
	1455319_x_at	Rps8	16.8015	3.15631	0.000154904
	1416074_a_at	Rpl28	16.8032	3.97794	0.000312111
	1415942_at	Rpl10	16.8061	2.27749	0.000193557
	1450150_a_at	Rpl13	16.8101	3.21766	0.000497042
	1426793_a_at	Rpl14	16.8126	4.69107	0.000317064
	1431177_a_at	Rpl10a	16.8313	3.26636	6.35593e-06
	1416404_s_at	Rps16	16.8418	3.71207	9.10479e-06
	1416141_a_at	Rps6	16.8611	1.62203	0.000157627
	1435873_a_at	Rpl13a	16.8734	2.0989	1.28762e-05
	1417608_a_at	Rpl13a	16.8739	2.93381	1.7452e-05
	1416719_a_at	Rps10	16.8804	3.16743	6.22709e-05
	1415962_at	Eif3h	16.8828	2.46554	0.000749612
	1415839_a_at	Npm1	16.8875	2.78093	0.00063066
	1455693_x_at	Rps6	16.8878	1.69546	0.000117856
	1434854_a_at	Rps10	16.893	3.32057	4.10759e-05
	1448252_a_at	Eef1b2	16.8936	3.58744	1.80089e-05
	1438507_x_at	Rpl14	16.9082	3.66836	8.90628e-05
	1436688_x_at	Rpl14	16.9143	3.35814	4.76435e-05
	1422859_a_at	Rpl23	16.9347	4.07659	7.89603e-05
	1418062_at	Eef1a2	16.9772	2.24962	0.00032486
	1417762_a_at	Rpl8	16.9955	2.32002	0.000490324
	1455001_x_at	Rpl13a	16.9972	2.61894	2.10677e-05
	1416546_a_at	Rpl6	16.9992	2.39616	1.94732e-05
	1422613_a_at	Rpl7a	17.0443	2.72165	0.000283283
	1456497_x_at	Rps10	17.0687	2.94252	7.44703e-05
	1433928_a_at	Rpl13a	17.0699	4.11928	7.97096e-06
	1432263_a_at	Cox7a2l	17.0977	2.06367	0.00067363
	1416142_at	Rps6	17.1008	3.61617	0.000142025
	1460575_at	Eif2a	17.1059	2.41341	0.000578165
	1449323_a_at	Rpl3	17.1181	3.00873	2.46629e-06
	1438723_a_at	Rps10	17.1208	2.73311	9.58553e-05
	1433688_x_at	Rpl14	17.1259	3.58761	6.31976e-05
	1452285_a_at	Eif3f	17.1591	2.90095	0.000352304
	1455168_a_at	Gnb2l1	17.1697	2.90007	9.27945e-05
	1419441_at	Rplp0	17.1882	3.67598	0.000236124
	1433689_s_at	Rps9	17.2081	3.6518	0.00070119
	1448846_a_at	Rpl29	17.2091	2.39094	0.000217615
	1415876_a_at	Rps26	17.2234	2.25914	9.53292e-05
	1433472_x_at	Rpl38	17.2713	2.35072	0.000270057
	1455245_x_at	Rpl13	17.2737	2.4659	7.75506e-05
	1437610_x_at	Rps8	17.303	2.62202	0.00027134
	1455600_at	Rps3	17.345	3.6551	0.000134427
	1436046_x_at	Rpl29	17.3599	2.44185	2.06949e-05
	1419553_a_at	Rabggtb	17.4148	2.73278	0.000455488
	1449506_a_at	Eef1d	17.4602	2.40552	0.000750223
	1451077_at	Rpl5	17.469	3.42172	0.000782164
	1460581_a_at	Rpl13	17.503	2.414	0.000282485
	1424635_at	Eef1a1	17.5453	1.92681	1.62671e-06
	1455348_x_at	Rpl29	17.5587	2.17634	0.000116815
	1431766_x_at	Rps2	17.671	2.03585	0.000549954
	1451296_x_at	pabpc4	17.7003	1.88598	0.000608393
	1454627_a_at	Rpl29	17.7047	2.29439	2.42613e-05
	1425026_at	Sft2d2	17.7194	1.65939	0.000467873
	1417125_at	Ahcy	17.7387	1.45025	0.000127823
	1431765_a_at	Rps2	17.7459	2.5184	0.000982086
	1426379_at	Eif4b	17.8154	2.0708	0.000215575
	1450934_at	Eif4a2	17.8205	3.61927	0.000887242
	1417364_at	Eef1g	17.9933	2.78838	2.39925e-05
	1416624_a_at	Uba52	18.3938	1.47455	0.000964112
